# Supplementary material for: Ezrin and Its Phosphorylated Thr567 form Are Key Regulators of Human Extravillous Trophoblast Motility and Invasion
Source: MDPI journal article supplement (doi:10.3390/cells12050711), 2023-02-23
Supplement: s1 [file s1]

## Supplementary Tables

**Table S1:** Antibodies used in this study.

| Antibody                             | Experiment | Type         | Clone                | Supplier        | Dilution | Incubation                     | Buffer          |
|--------------------------------------|------------|--------------|----------------------|-----------------|----------|--------------------------------|-----------------|
| <b>Ezrin</b>                         | IHC        | Monoclonal   | IgG Mouse            | Abcam           | 1/200    | Overnight at 4°C               | 2.5% goat serum |
| <b>HLA-G</b>                         | IHC        | Monoclonal   | IgG1 Mouse           | Abcam           | 1/100    | Overnight at 4°C               | 2.5% goat serum |
| <b>Cytokeratin 7</b>                 | IHC        | Monoclonal   | IgG Mouse            | Abcam           | 1/100    | Overnight at 4°C               | 2.5% goat serum |
| <b>Ezrin</b>                         | IF         | Monoclonal   | IgG Mouse            | Abcam           | 1/200    | Overnight at 4°C               | 2.5% goat serum |
| <b>Phospho-ezrin</b>                 | IF         | Monoclonal   | IgG Mouse            | Abcam           | 1/200    | Overnight at 4°C               | 2.5% goat serum |
| <b>Paxillin</b>                      | IF         | Monoclonal   | Mouse                | Invitrogen      | 1/200    | 45 minutes at room temperature | 1% Goat serum   |
| <b>α-Tubulin</b>                     | WB         | Monoclonal   | Mouse                | Sigma           | 1/5000   | Overnight at 4°C               | 3% BSA          |
| <b>Ezrin</b>                         | WB         | Monoclonal   | IgG Mouse            | Abcam           | 1/1000   | Overnight at 4°C               | 3% BSA          |
| <b>Phospho-ezrin</b>                 | WB         | Monoclonal   | IgG Mouse            | Abcam           | 1/1000   | Overnight at 4°C               | 3% BSA          |
| <b>Radixin</b>                       | WB         | Monoclonal   | IgG Rabbit           | Insight Biotech | 1/1000   | Overnight at 4°C               | 3% BSA          |
| <b>Moesin</b>                        | WB         | Monoclonal   | IgG Rabbit           | Insight Biotech | 1/1000   | Overnight at 4°C               | 3% BSA          |
| <b>Mouse</b>                         | WB         | Biotinylated | IgG Horse Anti-Mouse |                 |          |                                |                 |
| <b>Rabbit</b>                        | WB         | Biotinylated | IgG Goat Anti-Rabbit |                 |          |                                |                 |
| <b>Rabbit IgG (negative control)</b> | IHC        |              |                      | Santa Cruz      | 1/2000   | Overnight at 4°C               | 2.5% goat serum |
| <b>Mouse IgG (negative control)</b>  | IHC        |              |                      | Santa Cruz      | 1/100    | Overnight at 4°C               | 2.5% goat serum |

**Table S2: Total number of cells counted for motility and invasion of HTR8/SVneo and Swan71 trophoblast cell lines and primary EVT cells after ezrin knock down or NSC668394 treatment.**

| Cell lines                 |            | Control | Mock treatment | Ezrin siRNA 7 treatment | Ezrin siRNA 9 treatment | NSC668394 treatment |
|----------------------------|------------|---------|----------------|-------------------------|-------------------------|---------------------|
| <b>HTR8/SVneo motility</b> |            | 2724    | 2884           | 2321                    | 1032                    | 207                 |
| <b>HTR8/SVneo invasion</b> |            | 2541    | 2349           | 1505                    | 1079                    | 91                  |
| <b>Swan71 motility</b>     |            | 7436    | 2388           | 1440                    | 957                     | 2386                |
| <b>Swan71 invasion</b>     |            | 1731    | 814            | 228                     | 157                     | 331                 |
| <b>Primary motility</b>    | <b>EVT</b> | 1349    | N/A            | N/A                     | N/A                     | 740                 |
| <b>Primary invasion</b>    | <b>EVT</b> | 1077    | N/A            | N/A                     | N/A                     | 757                 |

HTR8/SVneo cells and Swan71 cells as well as primary first trimester EVT cells were either left untreated, mock treated or incubated with either ezrin siRNA7, ezrin siRNA9 or NSC668394 prior to seeding on Boyden chambers for motility or matrigel-coated Boyden chambers for invasion. Data presented in this Table are the sum of all cells counted on the far side of the chambers at the end of the incubation from three or four independent experiments (Figures 4, 5 and 7).
